1  
2  
3  
4  
5  
6  
7  
8  
9  
10  
11  
12  
13  
14  
15  
16  
17  
18  
19  
20  
21  
22  
23  
24  
25  
26  
27  
28  
29  
30  
31  
32  
33  
34  
35  
36  
37  
38  
39  
40  
41  
42  
43  
44  
45  
46

## Control of human testis-specific gene expression

Jay C. Brown  
Department of Microbiology, Immunology and Cancer Biology  
University of Virginia School of Medicine  
Charlottesville, Virginia 22908

Short Title: Human testis-specific gene expression

Corresponding author:  
Dr. Jay C. Brown  
Department of Microbiology, Immunology and Cancer Biology  
University of Virginia School of Medicine Box 800734  
000Charlottesville, Virginia 22908  
USA

Email: [jcb2g@virginia.edu](mailto:jcb2g@virginia.edu)  
Phone: 01-434-924-1814  
Fax: 01-434-924-1236

## 47 **Abstract**

## 48 **Background**

49 As a result of decades of effort by many investigators we now have an advanced level of  
50 understanding about several molecular systems involved in the control of gene expression.  
51 Examples include CpG islands, promoters, mRNA splicing and epigenetic signals. It is less  
52 clear, however, how such systems work together to integrate the functions of a living  
53 organism. Here I describe the results of a study to test the idea that a contribution might be  
54 made by focusing on genes specifically expressed in a particular tissue, the human testis.

## 55 **Experimental Design**

56 A database of 239 testis-specific genes was accumulated and each was examined for the  
57 presence of features relevant to control of gene expression. These include: (1) the  
58 presence of a promoter, (2) the presence of a CpG island (CGI) within the promoter, (3) the  
59 presence in the promoter of a transcription factor binding site near the transcription start  
60 site, (4) the level of gene expression, and (5) the above features in genes of cell types such  
61 as spermatocyte and spermatid that differ in their extent of differentiation.

## 62 **Results**

63 Of the 107 database genes with an annotated promoter, 56 were found to have one or  
64 more transcription factor binding sites near the transcription start site. Three of the binding  
65 sites observed, Pax-5, AP-2 $\alpha$  and GR $\alpha$ , stand out in abundance suggesting they may be  
66 involved in testis-specific gene expression. Compared to less differentiated testis-specific  
67 cells, genes of more differentiated cells were found to be (1) more likely to lack a CGI, (2)  
68 more likely to lack introns and (3) higher in expression level. The results suggest genes of

69 more differentiated cells have a reduced need for CGI-based regulatory repression,  
70 reduced usage of gene splicing and a smaller set of expressed proteins.

71

## 72 **Introduction**

73 The regulatory control of gene expression is a central feature of all living organisms.  
74 Beginning with the same genome sequence, features of differential gene expression  
75 collaborate to create the entire landscape of tissue and cell function including a life-long  
76 developmental program, pathways to maintain homeostasis and functions able to respond  
77 to environmental change. The crucial importance of gene regulatory control has made it a  
78 thoroughly-studied and familiar area of investigation. As a result we now know about  
79 central features of regulation including the role of promoters, CpG islands, epigenetic  
80 signaling, transcription factors, enhancers, structured chromosome domains, mRNA  
81 splicing and many others [1-7]. Lacking, however, is an appreciation of how the individual  
82 systems work together to produce smoothly functioning developmental and other programs.  
83 Are there features that are more fundamental in that they are expressed earlier in  
84 development or affect a greater number of tissues and cells? To what extent is the pathway  
85 of gene regulatory systems the same in different tissues? Are there pathways of gene  
86 expression that use some but not all of the gene regulatory features used in others? Are  
87 regulatory features deployed differently in developmental pathways compared to those  
88 involved in response to environmental change? The above questions and many related  
89 ones currently occupy investigators studying gene regulatory control.

90

91 I have adopted the view that progress might be made by focusing on the genes specifically  
92 expressed in a single tissue. Limiting the analysis in this way significantly reduces the  
93 number of genes to be examined and also may reduce the number of regulatory systems  
94 that need to be considered. It is anticipated that information generated about regulation of  
95 genes expressed specifically in a single tissue may be able to be generalized to a larger  
96 and more diverse gene population.

97

98 Here I describe the results of studies carried out to examine genes expressed specifically in  
99 the human testis [8]. Testis is attractive for study because it consists predominantly of a  
100 highly restricted number (four) of distinct cell types that are all on the same pathway  
101 leading to production of a single cellular product, sperm [9]. Also, the testis stands out,  
102 compared to other tissues, for the high number of tissue-specific genes [10], a property that  
103 offers a similarly high number of regulatory features that might be relevant. Together the  
104 two features of testis, a small number of cells and a large number of specific genes, offer  
105 the possibility of relating control of specific gene expression to defined cellular  
106 developmental events.

107

108 The study began with creation of a database containing 239 genes expressed specifically  
109 in human testis. Database genes were chosen to be representative of the larger population  
110 of all testis-specific genes. The database includes genes encoded on all but one of the 24  
111 human chromosomes; both protein-coding genes and genes that specify non-coding RNAs  
112 are represented. Database genes were examined for the presence and functioning of  
113 properties relevant to control of gene expression including the presence of a CpG island,

114 the presence of a promoter, transcription factor binding sites within the promoter and the  
115 level of gene expression. The results are interpreted to clarify the role of the above features  
116 in control of testis-specific gene usage and their significance for sperm development.

117

## 118 **Materials and Methods**

### 119 **Database of human testis-specific genes**

120 The database of human testis-specific genes employed here (Table S1) contains 239  
121 genes each annotated to be highly specific for testis in both the UCSC Genome Browser  
122 (version hg38, 2013 [ <https://genome.ucsc.edu/> ]) and the NCBI gene reference [ <https://www.ncbi.nlm.nih.gov/> ]. The database was curated from among genes contained in  
123 slightly larger databases of testis-specific genes [8, 11] and from a database of human  
124 gene promoters [12]. The goal was to create a gene set representative of all testis-specific  
125 genes.  
126 genes.

### 127 **Gene properties examined**

128 Genes with a CpG island (CGI) were identified from the UCSC Genome Browser (version  
129 hg38, 2013). All database testis-specific genes with an annotated CGI near the  
130 transcription start site (TSS) were included without regard to the length of the CGI or its  
131 percent GC content. Genes containing a promoter were identified by the FirstEF algorithm  
132 [13] as found in the 2003 (hg36) version of the UCSC Genome Browser. For all genes  
133 examined, the level of testis-specific expression was retrieved from the UCSC Genome  
134 Browser (version hg38, 2013). A gene was considered to be broadly expressed if it was  
135 annotated to have a comparable level of expression in half or more of the tissues reported  
136 in the UCSC or NCBI databases. The list of Djureinovic et al. [8] was used to identify gene-

137 encoded proteins highly enriched in spermatogonia, spermatocyte, spermatid or sperm.

138 Genes lacking introns were identified using the Intronless Gene Database

139 (<http://www.bioinfo-cbs.org/igd/>).

## 140 **Transcription factor binding sites**

141 Transcription factor binding sites (TFBS) near transcription start sites were identified

142 beginning with promoters downloaded from the UCSC Genome Browser [12]. Promoters

143 were identified by the FirstEF algorithm as described above. Each was 1000bp in length

144 beginning 570bp upstream from the TSS and ending 430bp downstream. The entire

145 1000bp promoter sequence was scanned for the presence of TFBS with the ALGGEN-

146 PROMO website running TRANSFAC version 8.3 (maximum matrix dissimilarity rate=2;

147 [http://alggen.lsi.upc.es/cgi-bin/promo\\_v3/promo/promoinit.cgi?dirDB=TF\\_8.3](http://alggen.lsi.upc.es/cgi-bin/promo_v3/promo/promoinit.cgi?dirDB=TF_8.3) ). TFBS or

148 combinations of contiguous TFBS were included in Table S1 if they were found between -

149 10bp and +10bp of the annotated TSS and were 6bp or more in length.

150

## 151 **Results**

### 152 **Testis-specific gene database**

153 Database testis-specific genes were found to be widely distributed among the 24 human

154 chromosomes. All but the Y chromosome encode at least one testis-specific database

155 gene. Chromosome 1 has the most (28 of 239 database genes) and chromosome 21 the

156 least (1 gene; Fig. 1a). When expressed as the number of database genes per 100Mb of

157 chromosome sequence, the highest number was found in chromosome 19 (19.0) and the

158 lowest in chromosome 21 (2.2; Fig. 1b).

159

160 **Fig. 1:** Chromosome distribution of database human testis-specific genes. (a) Number of  
161 database genes encoded on each chromosome. (b) Gene density expressed as  
162 genes/100mbp of chromosome sequence. Note the high density of database testis-specific  
163 genes on chromosome 19.

164  
165 The expression level of database genes was found to favor those with low expression. For  
166 instance, 194 of the 239 genes (81%) have expression levels in the lowest 1/3 of the  
167 distribution (Fig. 2). Among the highly expressed genes, the distribution shows preferred  
168 values of ~60, 170 and 215 RPKM suggesting there may be a mechanism to favor  
169 particular expression levels (Fig. 2).

170  
171 **Fig. 2:** Histogram showing the expression level of all database testis-specific human  
172 genes. Note that expression level is skewed to the low expression end of the distribution.

173  
174 **CpG islands in testis-specific human genes**  
175 As tissue specific genes have been reported to be depleted in CpG islands compared to  
176 broadly expressed genes [2, 14, 15], it was expected that database testis-specific genes  
177 would be depleted in CGI, and this was found to be the case (Table 1). Of the 239  
178 database genes, 127 (53.1%) were found to lack a CGI. In contrast, absence of a CGI was  
179 observed in only 8.0% of an unselected human gene population and 9.4% of a population  
180 of broadly expressed genes (Table 1). Testis-specific LINC genes were almost all lacking a  
181 CGI (14 of 15 LINC genes) while among testis-specific intronless genes the proportion was

182 about the same as the testis-specific population as a whole (50.0% for intronless genes  
183 compared to 53.1% for all database genes; Table 1).

184  
185 Table 1: Testis-specific genes lacking a CpG island

| Gene Population                            | Genes lacking a CpG Island <sup>a</sup> |
|--------------------------------------------|-----------------------------------------|
| Testis-specific (all database)             | 127/239 53.1%                           |
| Unselected human genes <sup>b</sup>        | 8/100 8.0%                              |
| Broadly-expressed human genes <sup>c</sup> | 10/106 9.4%                             |
| Testis-specific LINC genes                 | 14/15 93.3%                             |
| Testis-specific intronless genes           | 12/24 50.0%                             |

187 <sup>a</sup> Data from UCSC Genome Browser Reference Human Genome version  
188 hg38, 2013.

189  
190 <sup>b</sup> Sequential genes on chromosome 9 beginning with ACO1.

191  
192 <sup>c</sup> Sequential broadly-expressed genes on chromosome 12 beginning  
193 with ZNF641.

194  
195 Testis-specific database genes lacking a CGI did not differ greatly in expression level from  
196 CGI-containing testis-specific genes or from all testis-specific genes; mean expression  
197 levels were 48.4, 50.7 and 49.5 RPKM, respectively (Table 2). This result suggests CGI are  
198 not directly involved in determining gene expression level. The observation is compatible  
199 with the accepted view that CGI function in large-scale gene repression by way of  
200 methylation, a modification that suppresses expression of affected genes [2, 16].

201  
202 Table 2: Expression level of testis-specific gene populations

| Gene Population                             | Mean expression (RPKM) <sup>a</sup> | Range     |
|---------------------------------------------|-------------------------------------|-----------|
| Testis-specific (all database) <sup>b</sup> | 49.5 n=237                          | 0.2-743.8 |
| CGI-containing testis genes                 | 50.7 n=111                          | 0.2-438.6 |
| Testis genes lacking a CGI                  | 48.4 n=126                          | 1.1-743.8 |
| Testis-specific LINC genes <sup>c</sup>     | 21.8 n=14                           | 1.1-87.8  |
| Testis-specific intronless genes            | 89.4 n=22                           | 2.9-291.2 |
| Testis genes with a promoter                | 49.2 n=110                          | 0.2-554.8 |
| Testis genes with no promoter               | 49.7 n=127                          | 1.1-743.8 |



204 <sup>a</sup> Refseq data from GTEx Project via UCSC Genome Browser Reference Human  
205 Genome version hg38, 2013.

206  
207 <sup>b</sup> Not included are two protamine genes (PRM1 and PRM2) with very high expression  
208 levels plus missing value in chr22.

209  
210 <sup>c</sup> Not included is LINC01191 (chr2) with an outlier expression level.

211

212

### 213 **Expression levels of testis-specific LINC and intronless genes**

214 Testis-specific long, intergenic non-coding (LINC) genes were found to have a lower mean  
215 expression level compared to all testis-specific database genes. The difference was ~2.2  
216 fold (49.5 RPKM compared to 21.8; Table 2). This observation is in qualitative agreement  
217 with results showing decreased expression of LINC genes in databases of all human LINC  
218 genes [17, 18]. In contrast, database testis-specific intronless genes were found to have a  
219 mean expression level higher than that of all testis-specific genes (89.4RPKM compared to  
220 49.5; Table 2). This observation indicates that testis-specific intronless genes must possess  
221 strong nuclear export and other translation-enabling features that do not depend on the  
222 presence of introns and mRNA splicing pathways [19, 20].

223

### 224 **Testis-specific genes with a promoter**

225 As promoters can play an important role in control of gene expression, they were examined  
226 carefully in the testis-specific population considered here. Special attention was devoted to  
227 transcription factor binding sites (TFBS) near the annotated transcription start site because  
228 such TFBS can have a direct effect on initiation of new gene transcription [21, 22]. Less  
229 than half of the database testis-specific genes were found to have an annotated promoter  
230 (107/239 genes; 44.8%; see Table 3). This compares to greater than 90% in a population

231 of unselected human genes. Both LINC and intronless testis-specific gene populations  
 232 were also found to be depleted in promoter-containing genes. Percentages were 6.7%  
 233 (1/15) of LINC genes with a promoter and 29.1% (7/24) for intronless genes (Table 3). The  
 234 lower number of promoter-containing genes in the testis-specific population suggests that  
 235 in many testis-specific genes the functions of the promoter must be accomplished by  
 236 unannotated promoters or by other gene features.

237  
 238 Table 3: Testis-specific genes with a promoter and transcription factor binding site  
 239 near the transcription start site  
 240

| Gene Population                     | Genes with promoter <sup>a</sup> | Promoters with TFBS at TSS <sup>b</sup> |
|-------------------------------------|----------------------------------|-----------------------------------------|
| Testis-specific (all database)      | 107/239 44.8%                    | 56/107 52.3%                            |
| Unselected human genes <sup>c</sup> | 94/104 90.4%                     | 51/141 36.2%                            |
| Testis-specific LINC genes          | 1/15 6.7%                        | 1/1 100.0%                              |
| Testis-specific intronless genes    | 7/24 29.1%                       | 3/7 42.9%                               |

241 <sup>a</sup> Data from UCSC Genome Browser Reference Human Genome version  
 242 hg38, 2013.

243  
 244 <sup>b</sup> Within 10bp of the transcription start site.

245  
 246 <sup>c</sup> Sequential genes on chromosome 9 beginning with ACO1.

247  
 248  
 249 The ALGGEN-PROMO web site was used to retrieve transcription factor binding sites near  
 250 the TSS in database gene promoters as described in Materials and Methods. A total of 25  
 251 different transcription factor binding sites were observed among the 56 genes with a  
 252 promoter (see Tables S2 and 3). Highest in abundance were Pax-5, AP-2 $\alpha$  and GR- $\alpha$   
 253 which were present in 12, 10 and 8 gene promoters, respectively (Table 4). Together the  
 254 three account for 30 of the 56 transcription factor binding sites (53.5%) present in relevant  
 255 database genes suggesting they may have a role in regulation of testis-specific gene  
 256 expression. Eleven of the 25 different transcription factor binding sites were each present  
 257 near the TSS in only one database gene promoter (Table S2).

258

259 Table 4: Transcription factor recognition sequence near TSS in the promoters  
260 of database human testis-specific genes  
261

| Transcription Factor <sup>a</sup> | Sequence recognized  | No. genes | Mean. Expression (RPKM) | Range (RPKM) |
|-----------------------------------|----------------------|-----------|-------------------------|--------------|
| Pax-5                             | GCCC                 | 12        | 44.3                    | 12.5-174.2   |
| AP-2 $\alpha$ A                   | GCAGGC               | 10        | 80.6                    | 5.2-422.7    |
| GR- $\alpha$                      | ANAGGGR <sup>b</sup> | 6         | 132.4                   | 2.2-554.8    |
| GR- $\alpha$                      | CCTCT                | 2         | 34.4                    | 21.5-78.1    |

262

263 <sup>a</sup> Most abundant three transcription factors binding sites near TSS among  
264 25 TFBS in 56 testis-specific genes.

265

266 <sup>b</sup> N= A, T, G or C; R= A or G

267

268

269

270 The nucleotide sequences of transcription factor binding sites were also retrieved in case  
271 they might suggest the identity of other elements that recognize the same DNA sites (Table  
272 S2). The sequences were scanned visually to identify similarities, and the results are  
273 summarized in Table 4. One recurring site was found to correspond to the Pax-5 binding  
274 site, one for AP-2 $\alpha$ A and two for GR- $\alpha$  (Table 4). The four sequences suggest themselves  
275 as candidates for a role in control of testis-specific gene expression. In each sequence the  
276 relevant genes were found to vary significantly in level of expression indicating that the  
277 sequences and the transcription factors that bind them may act to activate or repress gene  
278 expression depending on the context of other regulatory features present (Tables S2 and  
279 4).

280

## 280 **Sperm progenitor cells in the testis**

281 Seminiferous tubules are the major structural feature of the testis accounting for more than  
282 80% of the testis mass. They consist of six distinct cell types. Four are direct precursors of

283 sperm (the spermatogonia, spermatocytes, spermatids and sperm themselves), while two  
284 others support spermatogenesis but do not themselves develop into sperm (Leydig and  
285 Sertoli cells). Sperm progenitor cells are arranged radially in the seminiferous tubule with  
286 the spermatogonia located furthest from the tubule lumen and spermatocytes, spermatids  
287 and sperm progressively nearer [23, 24].

288

289 Spermatogonial cells divide to produce: (1) primary spermatocytes capable of further  
290 differentiation to create sperm; and (2) cells capable of replenishing the spermatogonial  
291 population. Both spermatogonium progeny cell types are diploid. Primary spermatocytes  
292 undergo a meiotic division to produce secondary spermatocytes. These are haploid cells  
293 that divide to produce spermatids, cells that further differentiate to become sperm. The  
294 well-characterized pathway leading to sperm production described above creates an  
295 opportunity to ask how features controlling gene expression may correlate with and  
296 underlie the molecular events involved. Below I describe studies designed to clarify how  
297 aspects of gene regulatory control may be involved.

298

299 The studies were enabled by the existence of a database of 122 testis-specific genes  
300 whose expression has been defined in individual sperm pathway cell types [8].  
301 Assignments were made by noting the binding of protein-specific antibodies to sections of  
302 seminiferous tubule tissue. If the cell type(s) was defined for a testis-specific gene  
303 examined here, it is noted in Table S1. The results showed that the cell type(s) was defined  
304 for 40 of the 239 database genes. As shown in Table 5, four database genes were found in  
305 spermatogonium, 7 in spermatocytes, 17 in spermatid and 17 in sperm. Features of gene

306 regulatory control noted were: (1) the presence of a CGI in the promoter, (2) the presence  
307 of introns in the gene and (3) the gene expression level (Table 5).

308  
309 Table 5: Gene expression in sperm lineage cells

310

| Cell type          | Database genes with |            | Mean expression (RPKM) <sup>a</sup> | Range (RPKM) |
|--------------------|---------------------|------------|-------------------------------------|--------------|
|                    | No CG island        | No Introns |                                     |              |
| Spermatogonium     | 1/4 (25%)           | 1/5 (20%)  | 24.1 n=6                            | 7.7-58.7     |
| Spermatocyte       | 0/7 (0%)            | 1/8 (12%)  | 42.3 n=8                            | 7.7-93.6     |
| Spermatid          | 9/17 (53%)          | 4/16 (25%) | 91.9 n=13                           | 29.5-255.1   |
| Sperm <sup>b</sup> | 11/17 (65%)         | 6/18 (33%) | 101.1 n=13                          | 9.2-255.1    |

311 <sup>a</sup> Refseq data from GTEx Project via UCSC Genome Browser Reference Human  
312 Genome version hg38, 2013.

313  
314 <sup>b</sup> Not included are two protamine genes (PRM1 and PRM2) with very high expression  
315 levels

316  
317 The results in the case of CG islands show that the population of genes expressed at early  
318 stages of sperm formation (spermatogonia and spermatocytes) has a lower proportion of  
319 CGI-negative genes compared to the more differentiated cells (i.e. spermatid and sperm).  
320 The proportion in less differentiated cells more closely resembles that seen in unselected  
321 human gene populations (8.0%; see Table 1) than in all testis-specific genes (53.1%). In  
322 the more differentiated cells, however, the proportion is more similar to the population of all  
323 testis-specific genes (i.e. 53% and 65% compared to 53.1%). The result suggests that  
324 more differentiated cells are better able to function without a CGI or do not have a need for  
325 a CGI. This would be the case, for instance, if more differentiated cells do not require large  
326 scale, more permanent gene repression by the CGI methylation pathway.

327

328 The proportion of intronless genes in sperm precursor cell types was found to be lower than  
329 in the proportion in all testis-specific genes (i.e. 12%-33% compared to 50%; see Tables 5  
330 and 1). If this result is not affected by the small number of pathway-specific genes available  
331 for analysis, then it indicates that sperm precursor cells may benefit from gene splicing and  
332 nuclear export events found in splicing pathways.

333  
334 Finally, the expression level of genes in less differentiated cell types was found to be lower  
335 than those in more highly differentiated ones (Table 5). Levels in less differentiated cells  
336 were lower than the average for all testis-specific genes (i.e. 24.1 and 42.3 compared to  
337 49.4 RPKM) while higher levels were observed in the more differentiated populations. This  
338 observation is consistent with the idea that as cells differentiate they express a smaller  
339 number of distinct genes, but genes in the group are expressed at a higher level.

340

## 341 **Discussion**

### 342 **Control of gene expression**

343 Current ideas about vertebrate gene regulation emphasize the involvement of structured  
344 chromosomal domains [25-27]. Actively expressed genes are thought to be contained on  
345 regions of chromatin that project outward from a core region of heterochromatin, an area  
346 where gene expression is repressed. Projecting or looped chromatin regions contain a  
347 small number of active genes located between insulator regions composed of CTCF/  
348 cohesion or YY1 binding sites [26, 28]. Active genes present in loops contain RNA  
349 polymerase II (RNAPII), promoters and transcription factors involved in gene regulatory

350 control. Also present may be enhancer/promoter regions of DNA located remotely on the  
351 chromosome, but containing bound transcription factors able to affect gene expression.

352

### 353 **CG islands**

354 CGI-containing genes suggest themselves as components of the heterochromatic region  
355 where gene expression is suppressed. Methylation of CpG sequences is known to repress  
356 gene expression or to make temporary repression more permanent [2]. The absence of  
357 CGI from a substantial portion (~50%; Table 1) of the testis-specific genes examined here  
358 suggests CGI may be a threat to testis-specific gene expression if genes were able to be  
359 suppressed by CpG methylation. If repression is appropriate, then it might be safer to do so  
360 by a more targeted, less permanent mechanism. In contrast to the testis-specific genes that  
361 lack a CGI, the results here show that a significant proportion has a CGI (also ~50%; Table  
362 1). This would be the case with genes whose expression needs to be suppressed in non-  
363 testis tissues.

364

365 LINC genes constitute a second population where many genes lack CGIs (Table 1). LINC  
366 are weakly expressed genes that specify non-coding RNA molecules thought to function as  
367 sponges for unneeded proteins or perhaps as components of protein-RNA complexes [17,  
368 29]. The lack of CGIs in most LINC gene promoters suggests it is rarely necessary for their  
369 expression to be repressed permanently.

370

### 371 **Level of gene expression**

372 Current ideas about the role of structured chromosome domains provide few clues  
373 regarding factors that affect the level of gene expression. Proximity of a gene to a  
374 CTCF/cohesion insulator may potentiate expression, but otherwise little guidance is  
375 provided [26]. The results reported here indicate that a gene's expression level is not  
376 strongly affected by a CGI in the promoter region. The mean expression level of genes with  
377 a CGI in the promoter is about the same as that of genes lacking a CGI (Table 2). Also,  
378 LINC genes were found to be more weakly expressed compared to the average of testis-  
379 specific genes, and intronless genes are more strongly expressed. The latter observation is  
380 in conflict with results indicating that the level of gene expression is potentiated by the  
381 presence of introns and mRNA splicing pathways [30, 31].

382

### 383 **Transcription factor binding**

384 As it is well established that transcription factors bound to the promoter can have important  
385 effects on gene expression, transcription factor binding sites were examined thoroughly in  
386 the testis-specific gene population considered here. To simplify the analysis somewhat, I  
387 focused only on TFBS near the transcription start site. This simplification can be justified by  
388 the fact that the TSS is the site where transcription by RNAPII is initiated and where binding  
389 of a transcription factor might have its maximum effect.

390

391 The results led to the identification of three transcription factors (Pax-5, AP-2 $\alpha$ A and GR- $\alpha$ )  
392 whose abundance make them candidates for a role in testis-specific gene expression  
393 (Table 4). Although Pax-5 is best known for its effects on B cell development, it has been  
394 noted to be prominently expressed in testis [32 33]. A similar situation applies in the case of



395 AP-2 $\alpha$ A. While AP-2 $\alpha$  is best known for effects in the nervous system [34, 35], a related  
396 transcription factor, AP-2 $\gamma$ , recognizes a DNA sequence similar to that of AP-2 $\alpha$ A and has  
397 effects on testis development [36, 37]. I suggest that AP-2 $\gamma$  could be the factor that  
398 recognizes AP-2 sites in the testis-specific genes identified here. GR $\alpha$ , a member of the  
399 glucocorticoid receptor family, is widely expressed in human tissues where it is known to  
400 have multiple effects on gene expression [38]. It would have specific effects in the testis  
401 only if another feature such as a specific isoform or association with another protein were  
402 involved [39].

403  
404 As shown in Table 4, a wide range of expression level was observed among the genes  
405 having a TSS-proximal TF. For instance in the case of genes having a Pax-5 TF site, the  
406 range was 12.5-174.2 RPKM. This observation suggests the effect of individual TFs can be  
407 either activating or suppressive.

408

#### 409 **Differentiation of testis-specific cells**

410 The present study benefitted from the results of immuno-histochemical analyses in which  
411 testis-specific genes could be associated with cells at progressively more mature states of  
412 differentiation [8]. All four recognized pathway-specific cell types were found to be  
413 populated by at least a few database testis-specific genes (Table 5). This permitted  
414 features of gene regulatory control to be compared among genes of the four cell types (i.e.  
415 spermatogonium, spermatocyte, spermatid and sperm). The results showed that an  
416 increase in differentiated state correlated with an increase in the proportion of genes: (1)  
417 lacking a CGI, (2) lacking introns, and (3) with an increased level of gene transcription.

418  
419 The observed increase in the proportion of genes lacking a CGI may be interpreted in the  
420 same way as the similar increase observed in the case of broadly expressed compared to  
421 tissue specific genes [2, 15]. Genes of more highly specialized cells (i.e. tissue specific and  
422 more differentiated cells) may have a reduced need for permanent repression by the CpG  
423 methylation pathway. A similar interpretation is suggested to apply to the observed  
424 increase in intronless genes among more highly differentiated cells. Such genes may be  
425 reduced in their need for mRNA splicing and splicing-related pathways of mRNA transport  
426 out of the nucleus. The observed increase in tissue-specific gene expression level with cell  
427 differentiation state (Table 5) may be simply a consequence of the overall differentiation  
428 process. As a more highly specialized cell is created, the need for more abundant, highly  
429 specialized gene products is increased while products of less specialized cells is  
430 decreased.

431  
432 The observed increase in expression level in more differentiated cells could have a useful  
433 consequence for investigators studying gene regulation. The correlation of expression level  
434 with increased differentiation state could be used to identify the extent of differentiation in  
435 an unknown cell type.

436  
437 Finally, focus on a population of tissue specific genes as described here is interpreted to  
438 support the view that this is an attractive way to further our understanding of development  
439 and cell differentiation processes. It might be of interest, for instance, to know whether the  
440 observed increase in CGI-less genes and intronless genes observed here with more

441 differentiated testis-specific genes is also found in specific genes of other tissues.

442 Additional features of gene regulatory control such as the role of insulators and structural

443 domains might also be productively evaluated with tissue-specific genes.

#### 444 **Supporting Information**

445 Table S1: Database of human testis-specific genes

446 Table S2: Human database testis-specific genes with a promoter and a transcription factor

447 binding site near the transcription start site

448

#### 449 **Acknowledgments**

450 I thank Forde Upshur and Karsten Siller for invaluable programming support for this project.

451

#### 452 **Author Contributions**

453 All contributions: Jay C. Brown

454

#### 455 **References**

456 1. Gagniuc P, Ionescu-Tirgoviste C. Eukaryotic genomes may exhibit up to 10 generic  
457 classes of gene promoters. *BMC Genomics*. 2012;13:512.

458 2. Deaton AM, Bird A. CpG islands and the regulation of transcription. *Genes Dev*.  
459 2011;25(10):1010-22.

460 3. Portela A, Esteller M. Epigenetic modifications and human disease. *Nat Biotechnol*.  
461 2010;28(10):1057-68.

462 4. Lee TI, Young RA. Transcription of eukaryotic protein-coding genes. *Annu Rev*  
463 *Genet*. 2000;34:77-137.

- 464 5. Hnisz D, Abraham BJ, Lee TI, Lau A, Saint-Andre V, Sigova AA, et al. Super-  
465 enhancers in the control of cell identity and disease. *Cell*. 2013;155(4):934-47.
- 466 6. Dixon JR, Selvaraj S, Yue F, Kim A, Li Y, Shen Y, et al. Topological domains in  
467 mammalian genomes identified by analysis of chromatin interactions. *Nature*.  
468 2012;485(7398):376-80.
- 469 7. Black DL. Mechanisms of alternative pre-messenger RNA splicing. *Annu Rev*  
470 *Biochem*. 2003;72:291-336.
- 471 8. Djureinovic D, Fagerberg L, Hallstrom B, Danielsson A, Lindskog C, Uhlen M, et al.  
472 The human testis-specific proteome defined by transcriptomics and antibody-based  
473 profiling. *Mol Hum Reprod*. 2014;20(6):476-88.
- 474 9. Trainer TD. Histology of the normal testis. *Am J Surg Pathol*. 1987;11(10):797-809.
- 475 10. Uhlen M, Fagerberg L, Hallstrom BM, Lindskog C, Oksvold P, Mardinoglu A, et al.  
476 Proteomics. Tissue-based map of the human proteome. *Science* 2015;347(6220):1260419.
- 477 11. Liu Y, Jiang M, Li C, Yang P, Sun H, Tao D, et al. Human t-complex protein 11  
478 (TCP11), a testis-specific gene product, is a potential determinant of the sperm  
479 morphology. *Tohoku J Exp Med*. 2011;224(2):111-7.
- 480 12. Brown JC. Control of human gene expression: High abundance of divergent  
481 transcription in genes containing both INR and BRE elements in the core promoter. *PLoS*  
482 *One*. 2018;13(8):e0202927.
- 483 13. Davuluri RV, Grosse I, Zhang MQ. Computational identification of promoters and  
484 first exons in the human genome. *Nat Genet*. 2001;29(4):412-7.
- 485 14. Vinson C, Chatterjee R. CG methylation. *Epigenomics*. 2012;4(6):655-63.

- 486 15. Zhu J, He F, Hu S, Yu J. On the nature of human housekeeping genes. Trends  
487 Genet. 2008;24(10):481-4.
- 488 16. Bogdanovic O, Veenstra GJ. DNA methylation and methyl-CpG binding proteins:  
489 developmental requirements and function. Chromosoma. 2009;118(5):549-65.
- 490 17. Cabili MN, Trapnell C, Goff L, Koziol M, Tazon-Vega B, Regev A, et al. Integrative  
491 annotation of human large intergenic noncoding RNAs reveals global properties and  
492 specific subclasses. Genes Dev. 2011;25(18):1915-27.
- 493 18. Derrien T, Johnson R, Bussotti G, Tanzer A, Djebali S, Tilgner H, et al. The  
494 GENCODE v7 catalog of human long noncoding RNAs: analysis of their gene structure,  
495 evolution, and expression. Genome Res. 2012;22(9):1775-89.
- 496 19. Grzybowska EA. Human intronless genes: functional groups, associated diseases,  
497 evolution, and mRNA processing in absence of splicing. Biochem Biophys Res Commun.  
498 2012;424(1):1-6.
- 499 20. Lei H, Dias AP, Reed R. Export and stability of naturally intronless mRNAs require  
500 specific coding region sequences and the TREX mRNA export complex. Proc Natl Acad Sci  
501 U S A. 2011;108(44):17985-90.
- 502 21. Smale ST, Kadonaga JT. The RNA polymerase II core promoter. Annu Rev  
503 Biochem. 2003;72:449-79.
- 504 22. Roy AL, Singer DS. Core promoters in transcription: old problem, new insights.  
505 Trends Biochem Sci. 2015;40(3):165-71.
- 506 23. Ross MH, Pawlina W. Histology : a text and atlas : with correlated cell and molecular  
507 biology. 5th ed. Baltimore, MD: Lippincott Williams & Wilkins; 2006. xvii, 906 p. p.

- 508 24. Hill, M.A. (2019, March 18) Embryology Spermatozoa Development. Retrieved from  
509 [https://embryology.med.unsw.edu.au/embryology/index.php/Spermatozoa\\_Development](https://embryology.med.unsw.edu.au/embryology/index.php/Spermatozoa_Development) .
- 510 25. Li G, Ruan X, Auerbach RK, Sandhu KS, Zheng M, Wang P, et al. Extensive  
511 promoter-centered chromatin interactions provide a topological basis for transcription  
512 regulation. *Cell*. 2012;148(1-2):84-98.
- 513 26. Tang Z, Luo OJ, Li X, Zheng M, Zhu JJ, Szalaj P, et al. CTCF-Mediated Human 3D  
514 Genome Architecture Reveals Chromatin Topology for Transcription. *Cell*. 2015;  
515 163(7):1611-27.
- 516 27. van Steensel B, Belmont AS. Lamina-Associated Domains: Links with Chromosome  
517 Architecture, Heterochromatin, and Gene Repression. *Cell*. 2017;169(5):780-91.
- 518 28. Weintraub AS, Li CH, Zamudio AV, Sigova AA, Hannett NM, Day DS, et al. YY1 Is a  
519 Structural Regulator of Enhancer-Promoter Loops. *Cell*. 2017;171(7):1573-88 e28.
- 520 29. Ulitsky I, Bartel DP. lincRNAs: genomics, evolution, and mechanisms. *Cell*. 2013;  
521 154(1):26-46.
- 522 30. Nott A, Meislin SH, Moore MJ. A quantitative analysis of intron effects on  
523 mammalian gene expression. *RNA*. 2003;9(5):607-17.
- 524 31. Shaul O. How introns enhance gene expression. *Int J Biochem Cell Biol*. 2017;91(Pt  
525 B):145-55.
- 526 32. Adams B, Dorfler P, Aguzzi A, Kozmik Z, Urbanek P, Maurer-Fogy I, et al. Pax-5  
527 encodes the transcription factor BSAP and is expressed in B lymphocytes, the developing  
528 CNS, and adult testis. *Genes Dev*. 1992;6(9):1589-607.

- 529 33. McManus S, Ebert A, Salvagiotto G, Medvedovic J, Sun Q, Tamir I, et al. The  
530 transcription factor Pax5 regulates its target genes by recruiting chromatin-modifying  
531 proteins in committed B cells. *EMBO J.* 2011;30(12):2388-404.
- 532 34. Gestri G, Osborne RJ, Wyatt AW, Gerrelli D, Gribble S, Stewart H, et al. Reduced  
533 TFAP2A function causes variable optic fissure closure and retinal defects and sensitizes  
534 eye development to mutations in other morphogenetic regulators. *Hum Genet.* 2009;  
535 126(6):791-803.
- 536 35. Schorle H, Meier P, Buchert M, Jaenisch R, Mitchell PJ. Transcription factor AP-2  
537 essential for cranial closure and craniofacial development. *Nature.* 1996;381(6579):235-8.
- 538 36. Pauls K, Jager R, Weber S, Wardelmann E, Koch A, Buttner R, et al. Transcription  
539 factor AP-2gamma, a novel marker of gonocytes and seminomatous germ cell tumors. *Int J*  
540 *Cancer.* 2005;115(3):470-7.
- 541 37. Eckert D, Buhl S, Weber S, Jager R, Schorle H. The AP-2 family of transcription  
542 factors. *Genome Biol.* 2005;6(13):246.
- 543 38. Oakley RH, Cidlowski JA. The biology of the glucocorticoid receptor: new signaling  
544 mechanisms in health and disease. *J Allergy Clin Immunol.* 2013;132(5):1033-44.
- 545 39. Schultz R, Isola J, Parvinen M, Honkaniemi J, Wikstrom AC, Gustafsson JA, et al.  
546 Localization of the glucocorticoid receptor in testis and accessory sexual organs of male  
547 rat. *Mol Cell Endocrinol.* 1993;95(1-2):115-20.
- 548
- 549

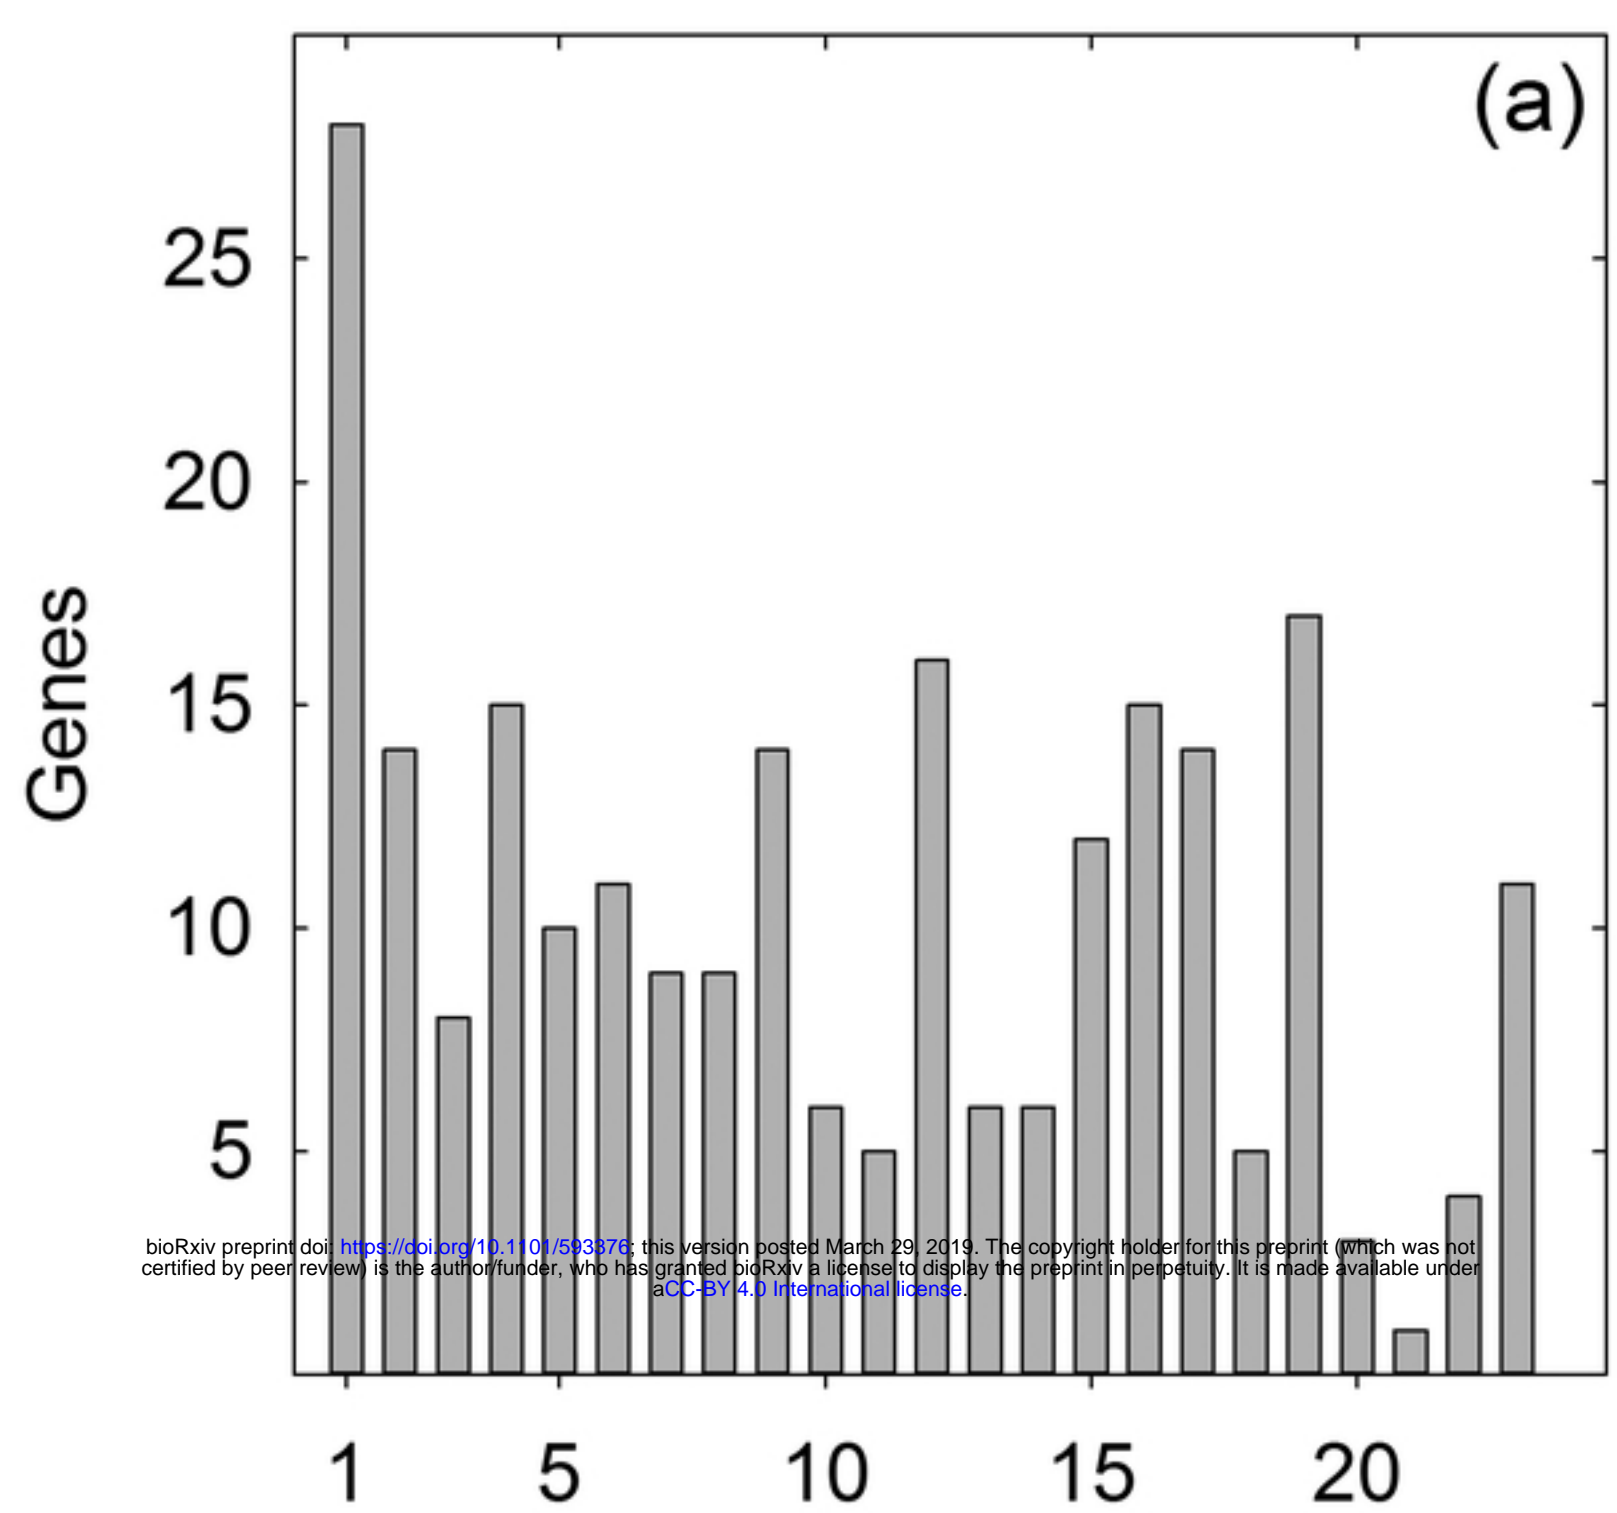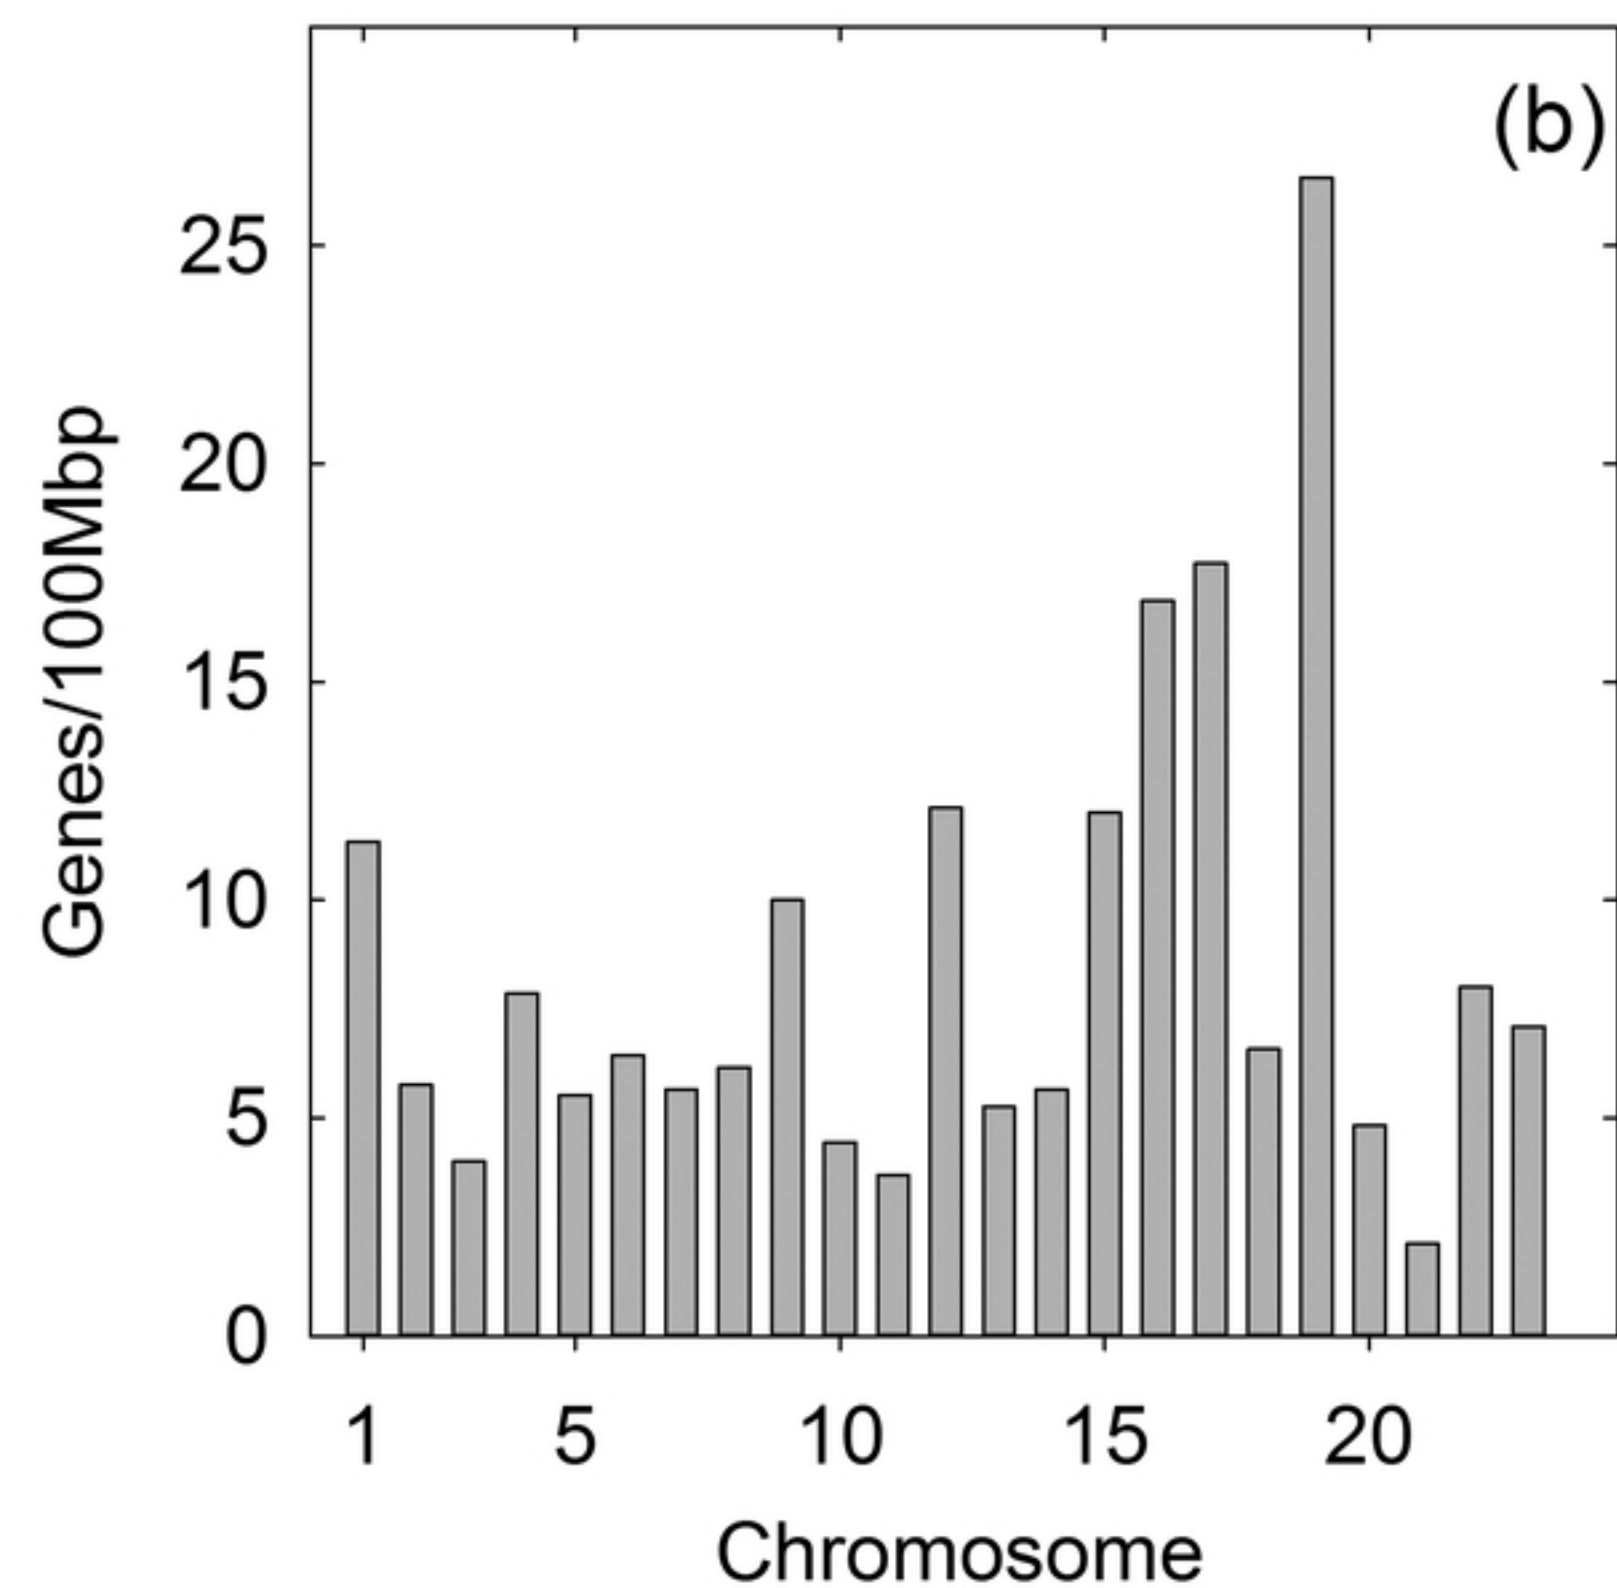

Figure



Number of Genes

bioRxiv preprint doi: <https://doi.org/10.1101/593376>; this version posted March 29, 2019. The copyright holder for this preprint (which was not certified by peer review) is the author/funder, who has granted bioRxiv a license to display the preprint in perpetuity. It is made available under aCC-BY 4.0 International license.

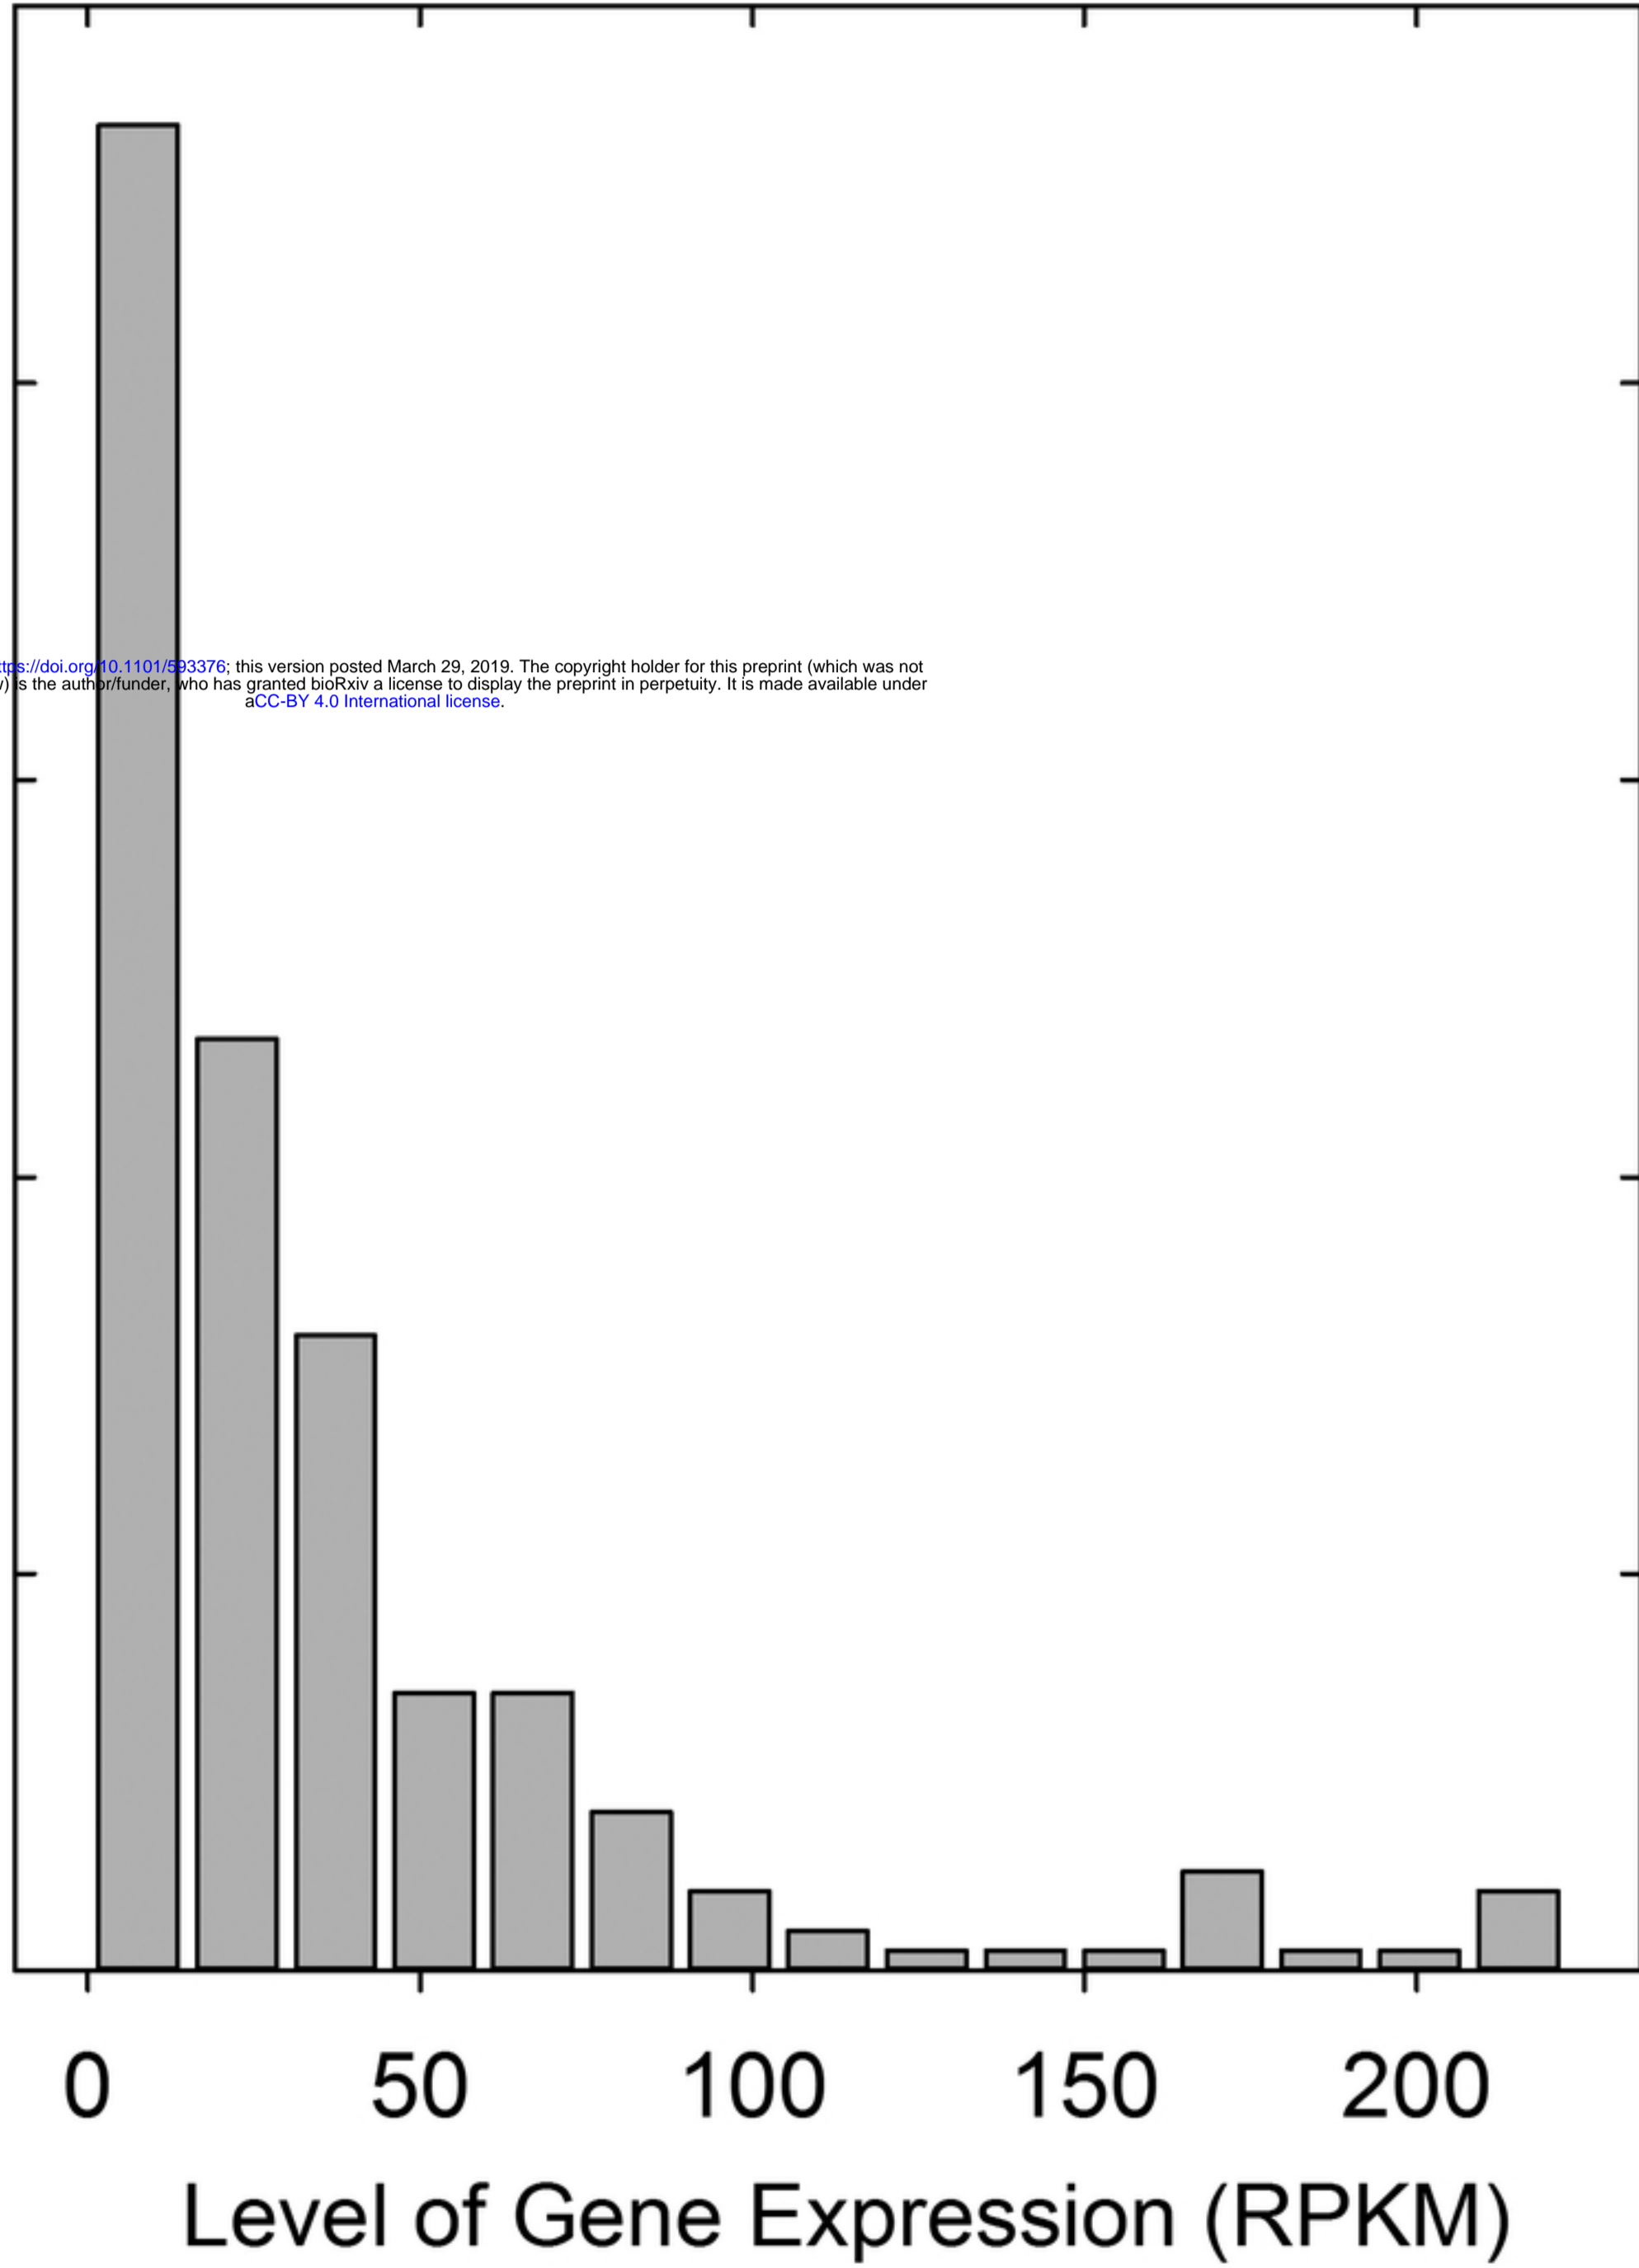

Figure
